# Supplementary material
Source: Springer Nature journal article supplement (https://www.springermedizin.de/resource/supplementary/13256_2013_3118_MOESM1_ESM.pdf/9651336)

120kV/ 187mAs  
0.75s/5.0mm/1.0x16  
15.00mm/r  
HP15.0

M (175.04)  
9594  
134.50mm  
FFFF  
+9.5D  
(256,253)

R

WL= 35  
WW= 90  
NON CONTRAST  
Activion16

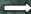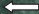

Supplement: MOESM1 [file 9651336]
